# Supplementary material for: Mechanochemistry and co-crystal formation: effect of solvent on reaction kineticsElectronic supplementary information (ESI) available for PXRD profiles showing the grinding results for CTA + Bipy with and without solvent as well as CTA + 2fPh with different solvents. See http://www.rsc.org/suppdata/cc/b2/b207369m/
Source: Royal Society of Chemistry journal article supplement (doi:10.1039/b207369m), 2002-09-18

# Supplementary data

**Fig. ESI 1**Powder X-ray diffraction pattern of (a) **CTA**, (b) **Bipy**, (c) ground dry mixture of **CTA**+**Bipy** (1hr), (d) ground mixture of **CTA**+**Bipy** with MeOH (20min), (e) simulated pattern from single-crystal structure of **CTA.Bipy**.


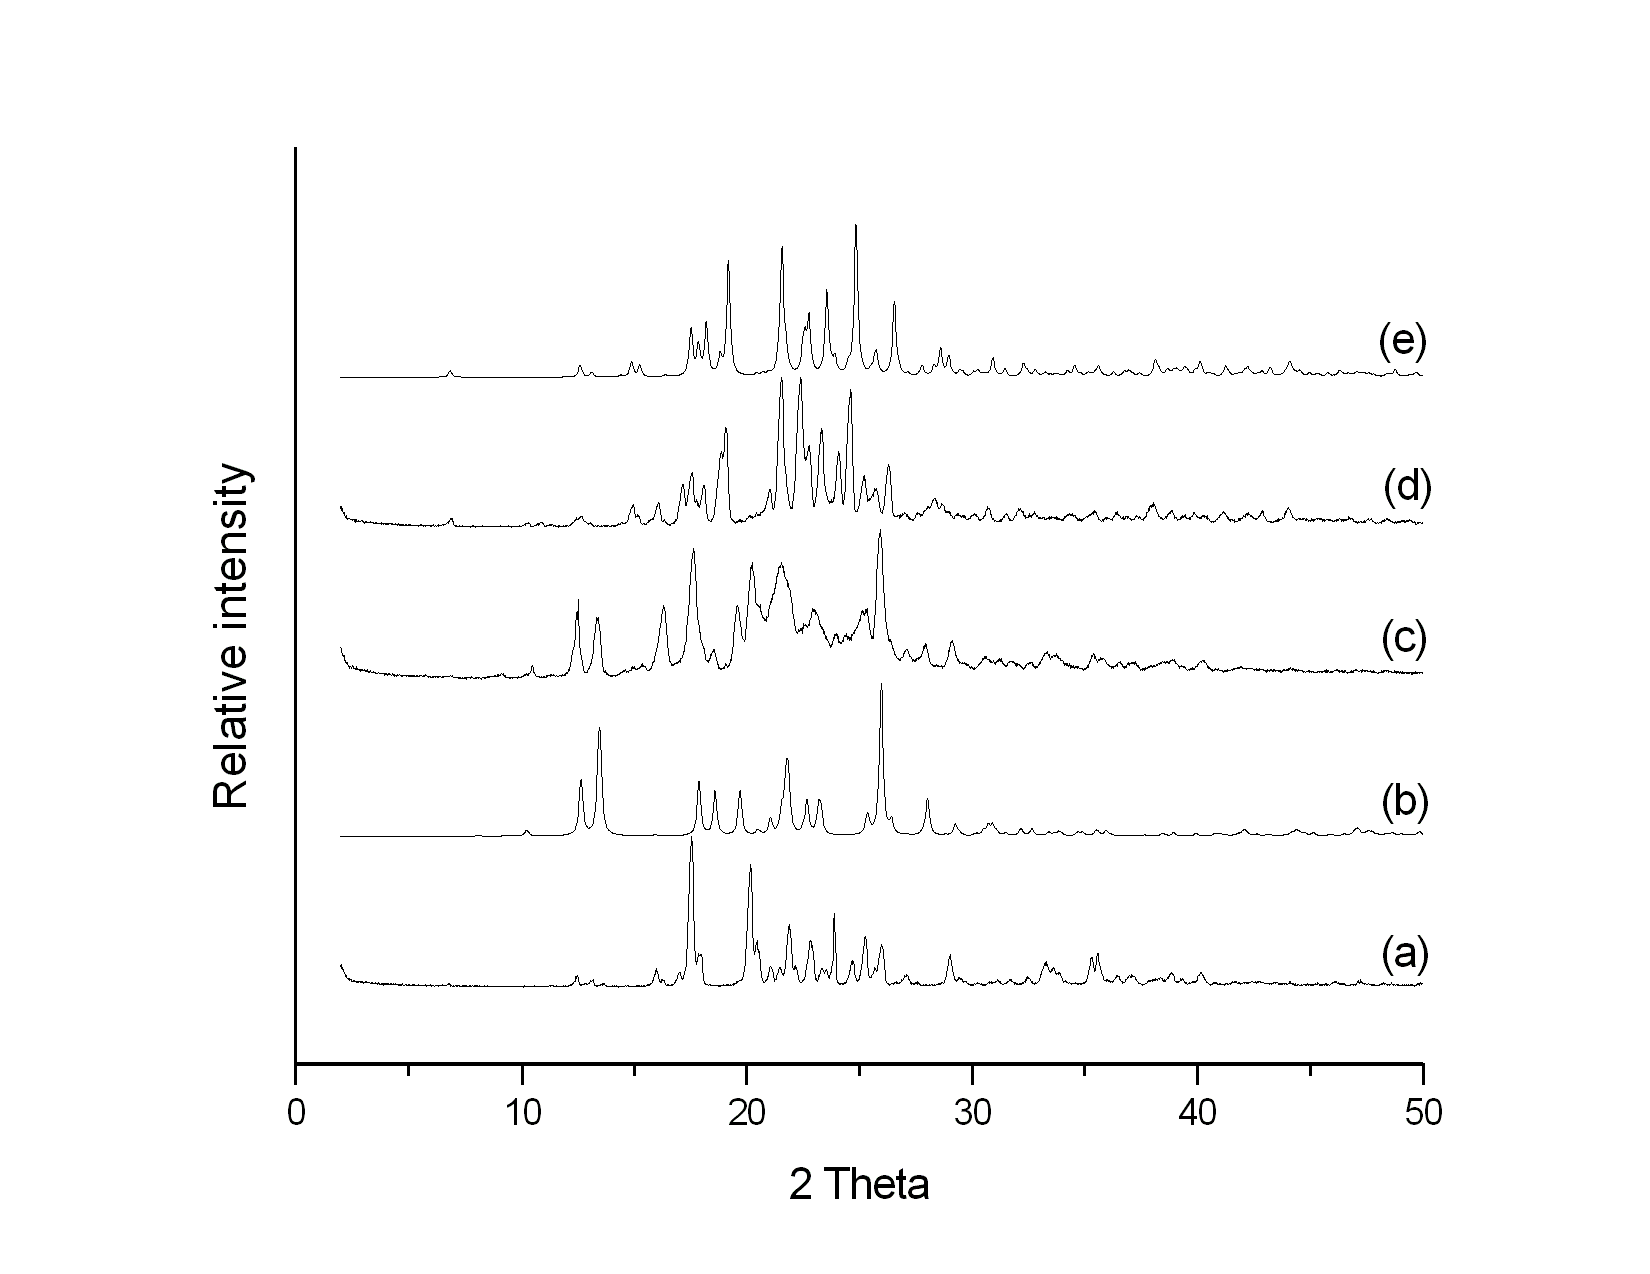


**Fig. ESI 2**Powder X-ray diffraction pattern of (a) **CTA**, (b) **fPh**, (c) ground mixture of **CTA**+2**fPh** with cyclohexane (1.5hr), (d) ground mixture of **CTA**+2**fPh** with acetonitrile (20min), (e) ground mixture of **CTA**+2**fPh** with ethyl acetate (20min), (f) ground mixture of **CTA**+2**fPh** with water (20min), (g) simulated pattern from single-crystal structure of **CTA.2fPh**.


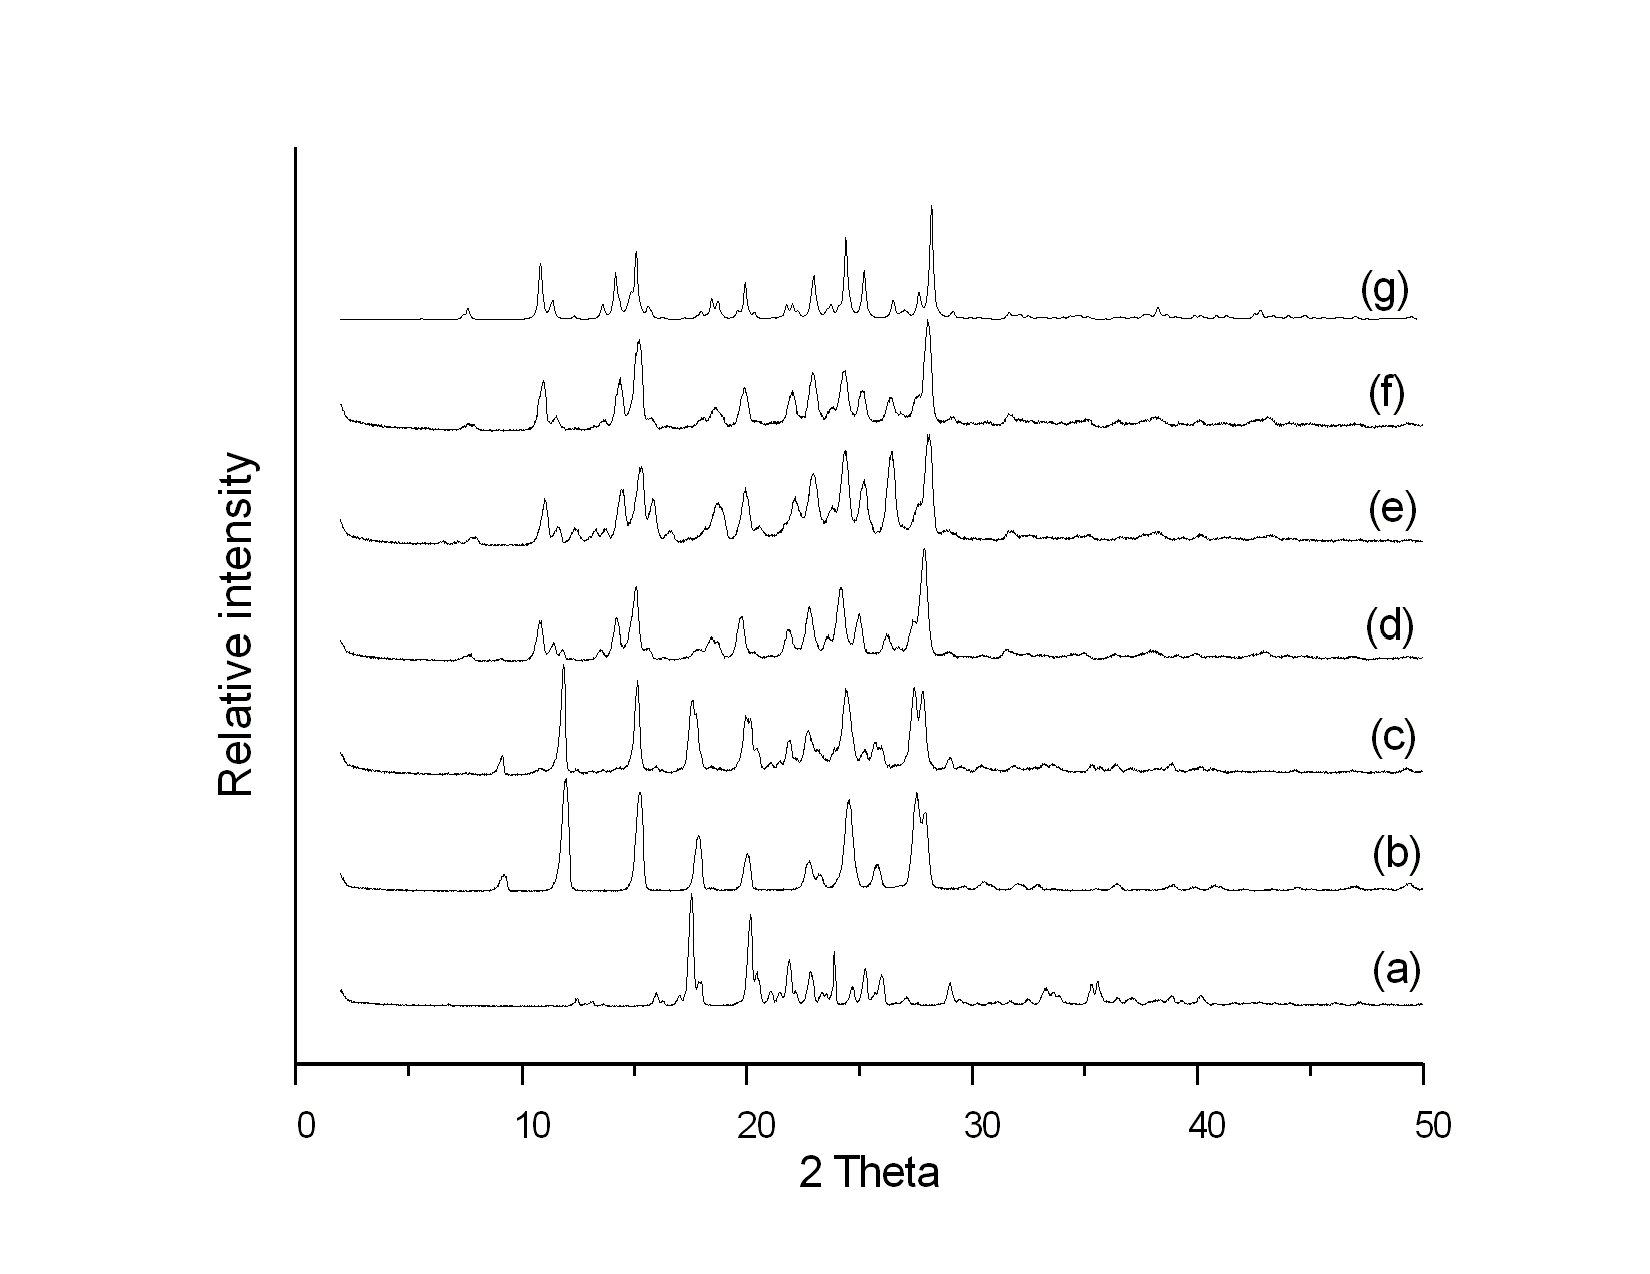

Supplement: b207369m.doc [file b207369m.doc]
